# Supplementary material for: MoS2/Cu as a peptide/nucleotide-matrix-free laccase mimetic nanozyme for robust catalytic oxidation of phenolic pollutants
Source: Royal Society of Chemistry journal article supplement (doi:10.1039/d3nj03952h), 2023-01-01
Supplement: d3nj03952h1.pdf [file d3nj03952h1.pdf]

**MoS<sub>2</sub>/Cu as a peptide/nucleotide-matrix-free laccase mimetic nanozyme for robust catalytic  
oxidation of phenolic pollutants**

Biniyam Abera Ankala<sup>a</sup>, Afomiya Animaw Achamyeh<sup>b</sup> Ebrahim M. Abda<sup>b</sup> Yitayal Admassu  
Workie<sup>a,d</sup>, Wei-Nien Su<sup>c</sup>, Aselefech Sorsa Wotango<sup>\*a</sup>, Membere Leul Mekonnen<sup>\*a,d</sup>

---

<sup>a</sup> Industrial Chemistry Department, Addis Ababa Science and Technology University, Addis Ababa, P.O. Box 1647, Ethiopia.

<sup>b</sup> Biotechnology Department, Addis Ababa, Addis Ababa Science, and Technology University, P.O. Box 1647, Ethiopia.

<sup>c</sup> Graduate Institute of Applied Science and Technology, National Taiwan University of Science and Technology, Taipei 106, Taiwan

<sup>d</sup> Nanotechnology Center of Excellence, Addis Ababa Science and Technology University, Addis Ababa, P.O. Box 1647, Ethiopia.

---

Corresponding author: [membere.leul@aastu.edu.et](mailto:membere.leul@aastu.edu.et), [aselefech.sorsa@aastu.edu.et](mailto:aselefech.sorsa@aastu.edu.et)

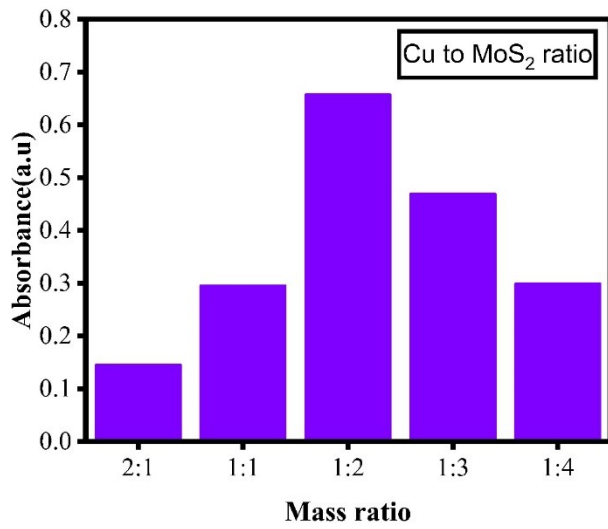

Figure S1 MoS<sub>2</sub> to Cu mass ratio

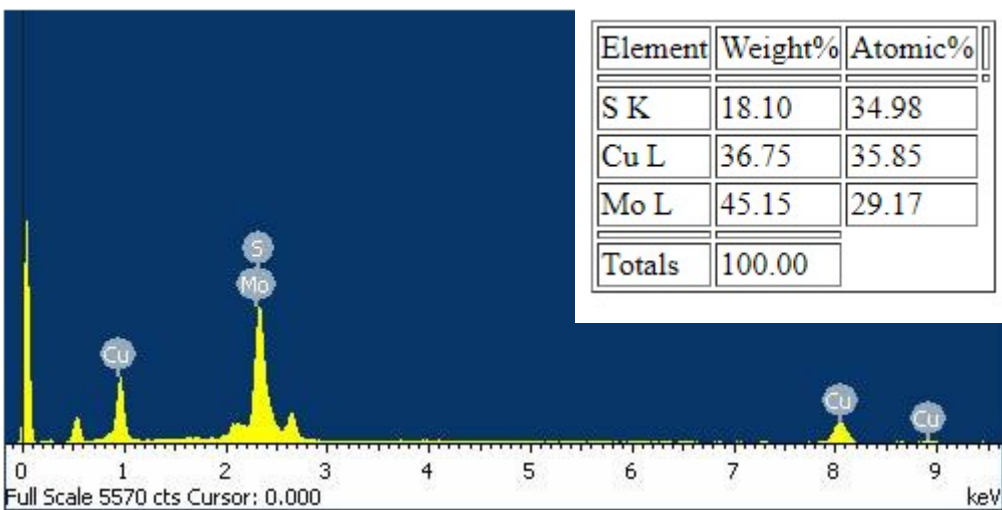

Figure S2 EDX spectrum of MoS<sub>2</sub>/Cu nanozyme (inset: elemental composition)
